# Supplementary material for: Dual-defect site regulation on MOF-derived P-Co3O4@NC@Ov-NiMnLDH carbon arrays for high-performance supercapacitors
Source: Royal Society of Chemistry journal article supplement (doi:10.1039/d2ta05146j), 2022-01-01
Supplement: d2ta05146j1.pdf [file d2ta05146j1.pdf]

# **Dual-defect sites regulation on MOF-derived P-Co<sub>3</sub>O<sub>4</sub>@NC@O<sub>v</sub>-NiMnLDH carbon arrays for high-performance supercapacitors**

Fangfang Zhu,<sup>a</sup> Lin Sun,<sup>a</sup> Yu Liu,<sup>a</sup> and Weidong Shi<sup>a,\*</sup>

<sup>a</sup> *School of Chemistry and Chemical Engineering, Jiangsu University, Zhenjiang, 212013, P. R. China.*

<sup>\*</sup> *E-mail: [swd1978@ujs.edu.cn](mailto:swd1978@ujs.edu.cn). Tel: +86-511-88791800*

## Experimental Section

### preparation of CNT@ZIF-8 derived C

100 ml methanol solution containing 50 mg CNTs was sonicated for 1 h, then 0.35 g  $\text{Zn}(\text{NO}_3)_2 \cdot 6\text{H}_2\text{O}$  was added and stirred for 1 h to form solution A. Solution B is a 50 ml methanol solution that dissolves 1.052 g of 2-methylimidazole. Then add solution B to solution A, stir for 1 h, stand at room temperature for 24 h, centrifugally wash and collect samples, and calcine at 800 °C for 2 h.

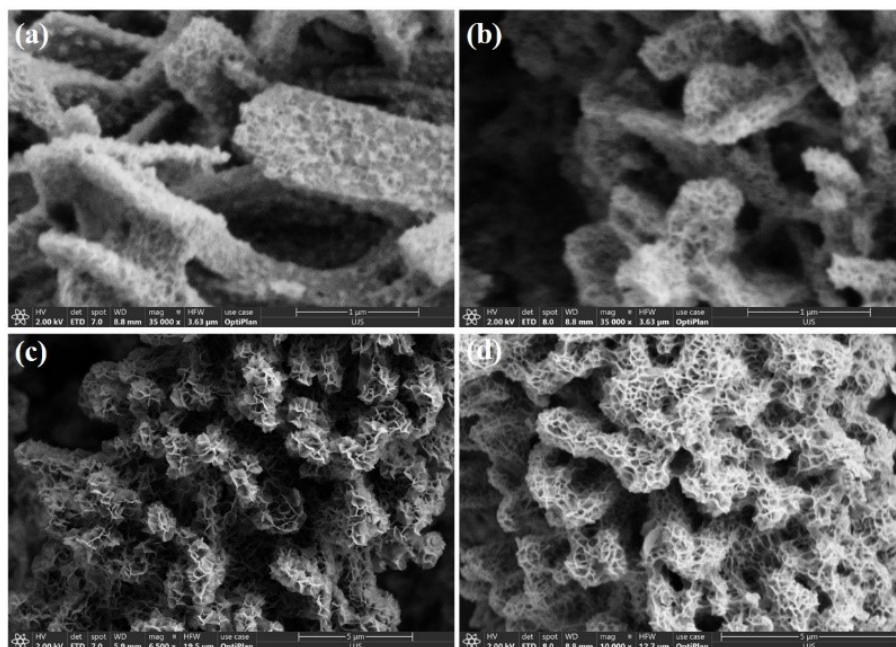

**Fig. S1** The SEM image of  $\text{P-Co}_3\text{O}_4@\text{NC}@\text{NiMnLDH}$  with different reaction time (a) 4 h, (b) 6 h, (c) 8 h, (d) 10 h.

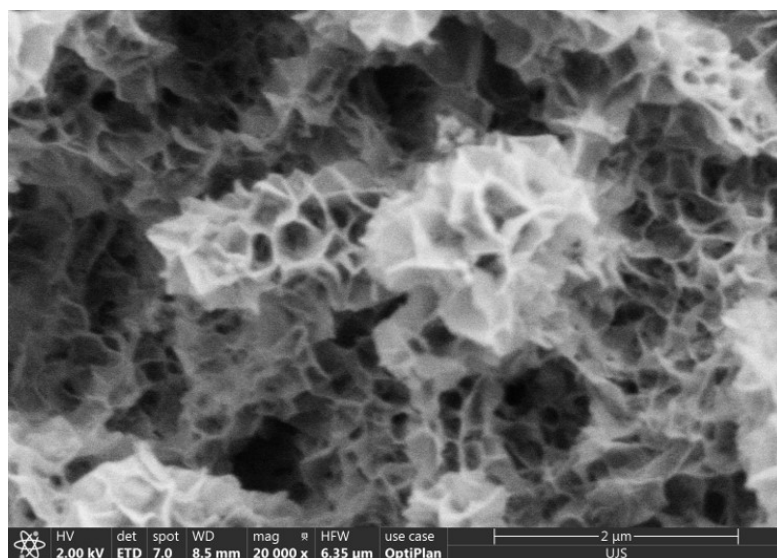

**Fig. S2** The SEM image of P-Co<sub>3</sub>O<sub>4</sub>@NC@NiMnLDH.

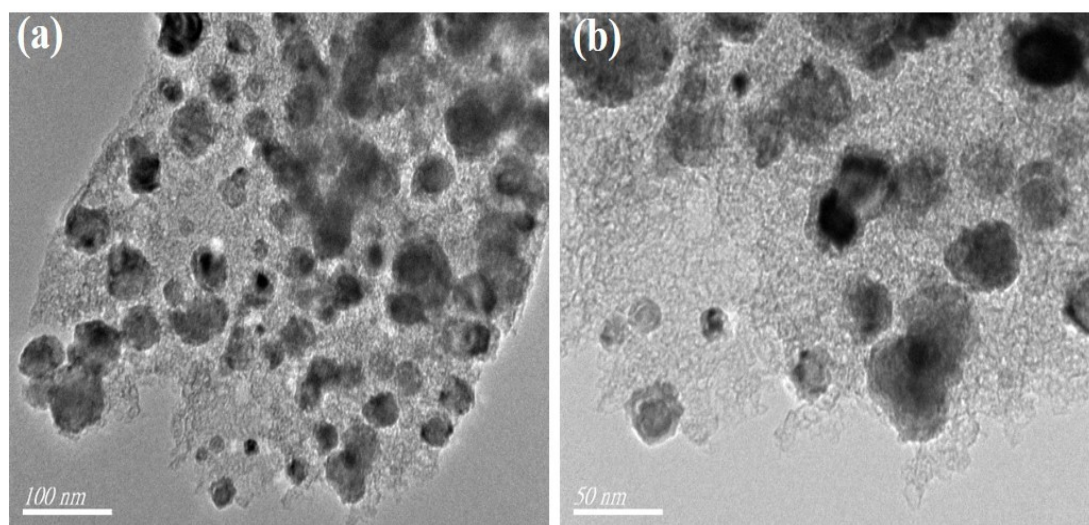

**Fig. S3** The TEM image of Co@NC.

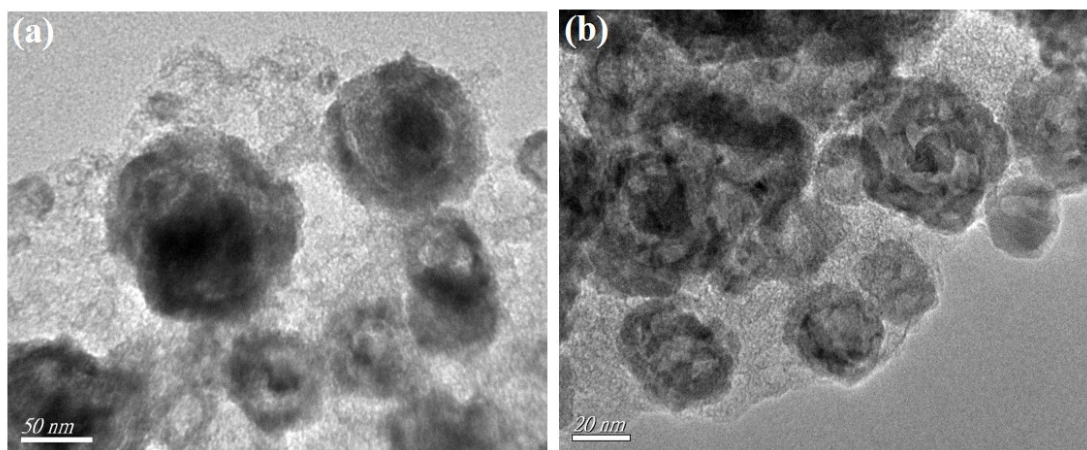

**Fig. S4** The TEM image of P-Co<sub>3</sub>O<sub>4</sub>@NC.

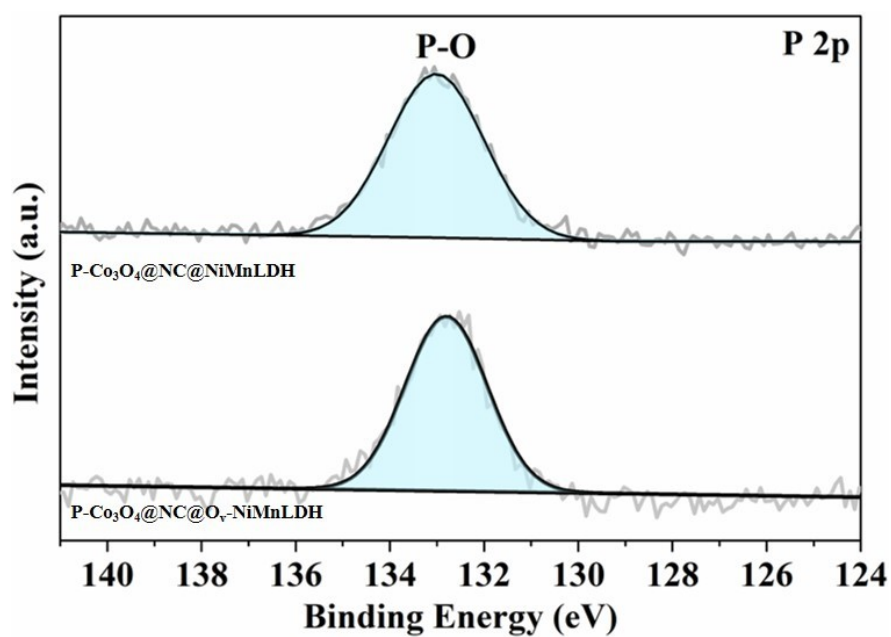

**Fig. S5** P 2p XPS spectra of the P-Co<sub>3</sub>O<sub>4</sub>@NC@NiMnLDH and the P-Co<sub>3</sub>O<sub>4</sub>@NC@O<sub>v</sub>-NiMnLDH electrode.

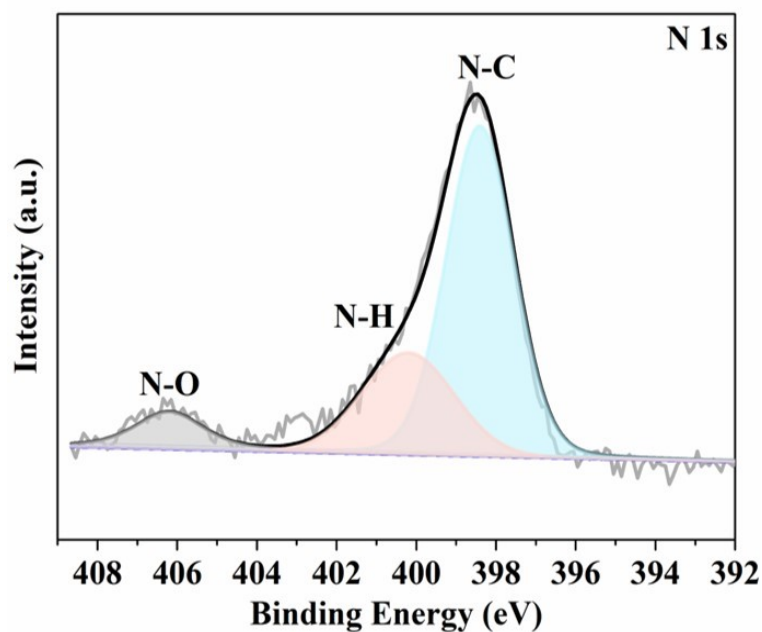

**Fig. S6** N 1s XPS spectra of the P-Co<sub>3</sub>O<sub>4</sub>@NC@O<sub>v</sub>-NiMnLDH.

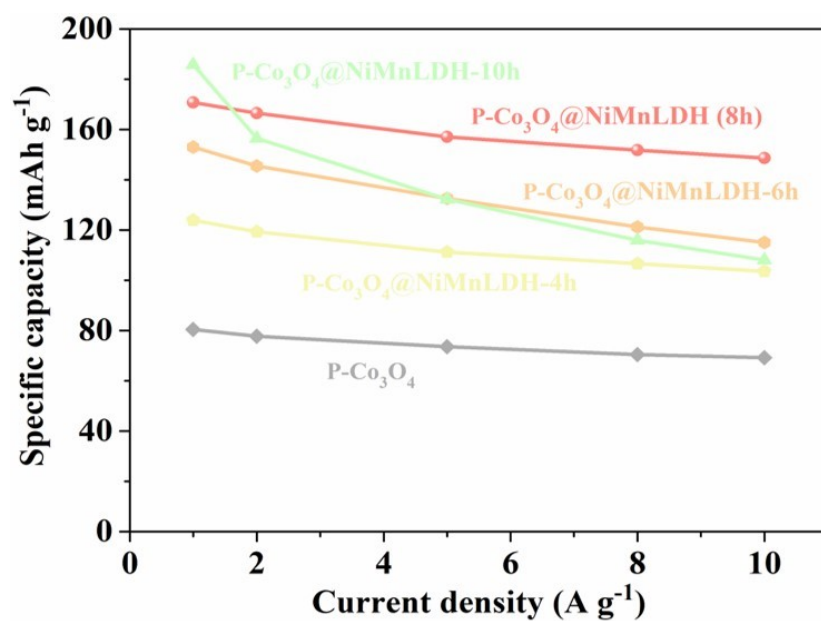

**Fig. S7** The comparison of specific capacity of the as-prepared P-Co<sub>3</sub>O<sub>4</sub>@NC@NiMnLDH electrode with different LDH reaction time.

It can be seen from the figure that when the growth time of LDH is 8h, the electrode has the highest electrochemical charge discharge performance

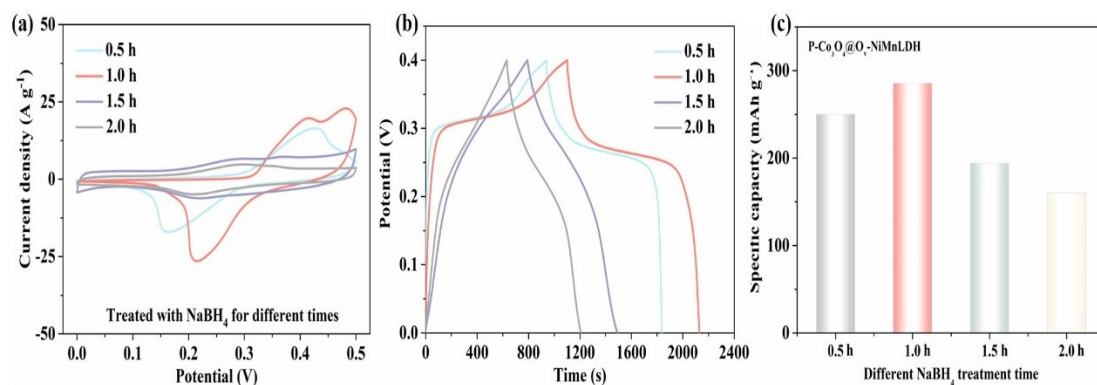

**Fig. S8** The comparison of (a) CV curves at 5 mV s<sup>-1</sup>, (b) GCD curves at 1 A g<sup>-1</sup>, (c) Specific capacity based on discharge time of the as-prepared P-Co<sub>3</sub>O<sub>4</sub>@NC@O<sub>v</sub>-NiMnLDH electrode with different NaBH<sub>4</sub> treatment times (0.5 h, 1 h, 1.5 h and 2 h).

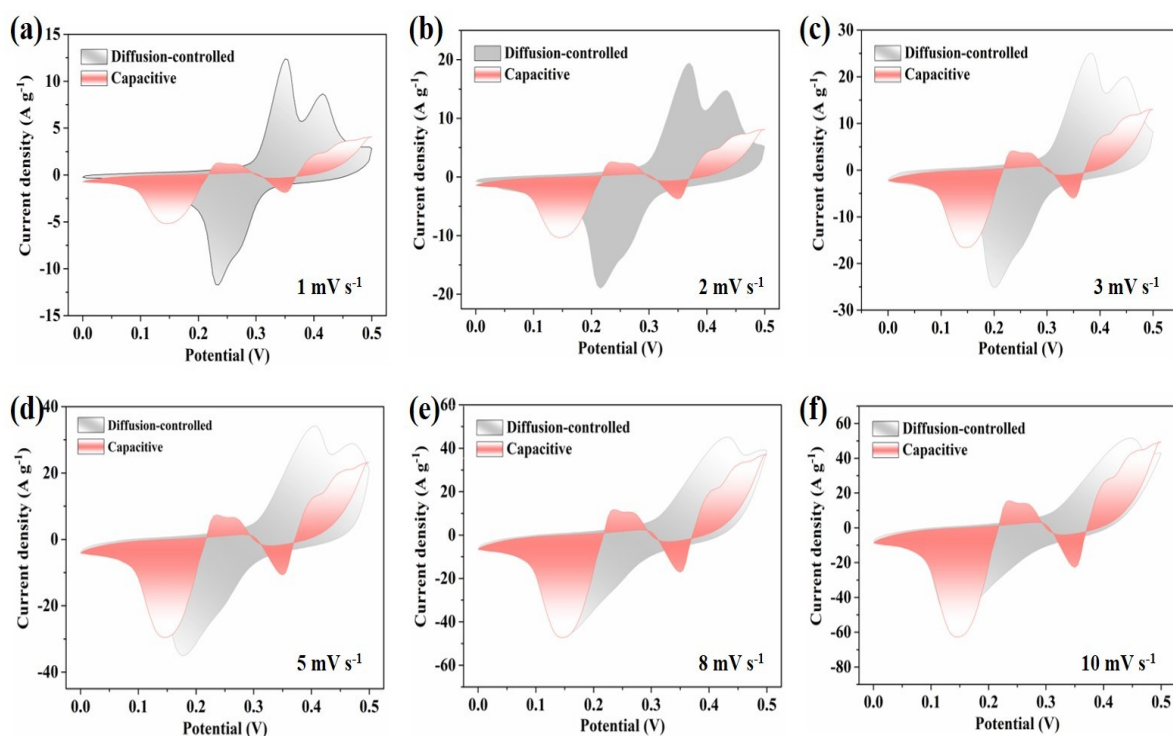

**Fig. S9** The capacity analysis of the P-Co<sub>3</sub>O<sub>4</sub>@NC@O<sub>v</sub>-NiMnLDH electrode at different scanning rates.

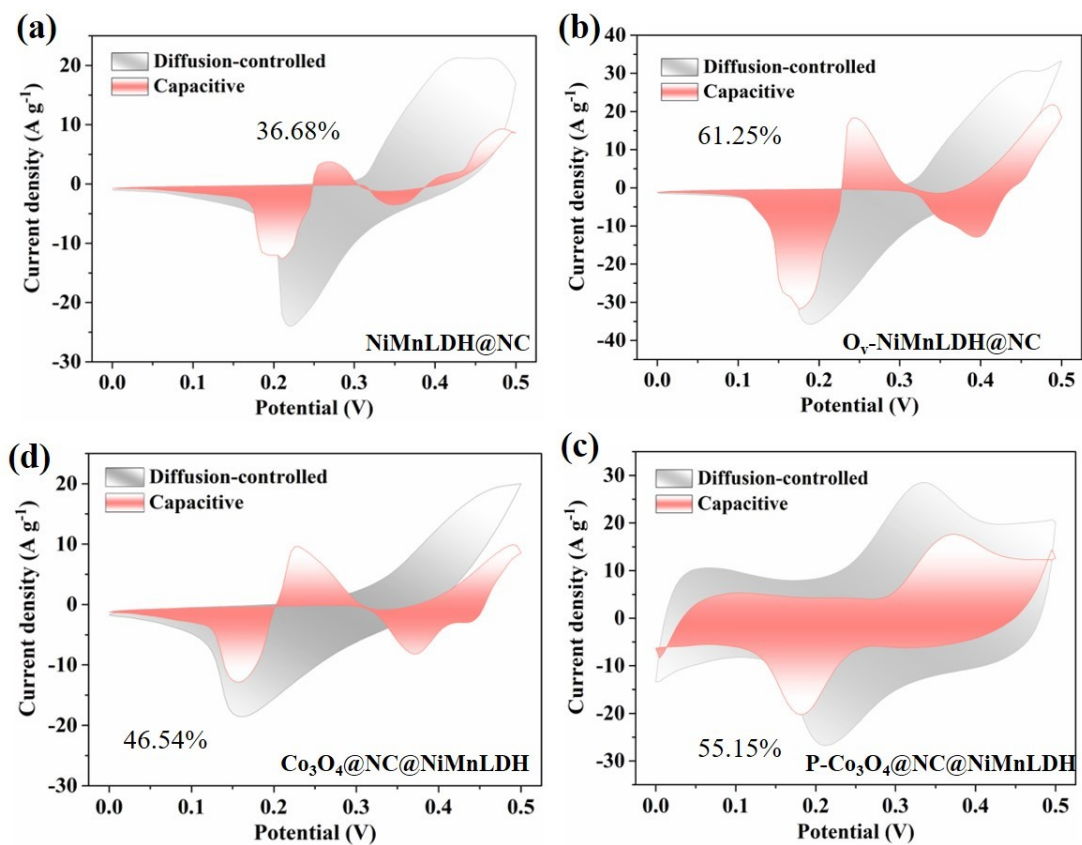

**Fig. S10** The capacity analysis of the NiMnLDH@NC,  $\text{O}_v\text{-NiMnLDH@NC}$ ,  $\text{Co}_3\text{O}_4\text{@NC@NiMnLDH}$ , P- $\text{Co}_3\text{O}_4\text{@NC@NiMnLDH}$  electrode at  $10 \text{ mV s}^{-1}$ .

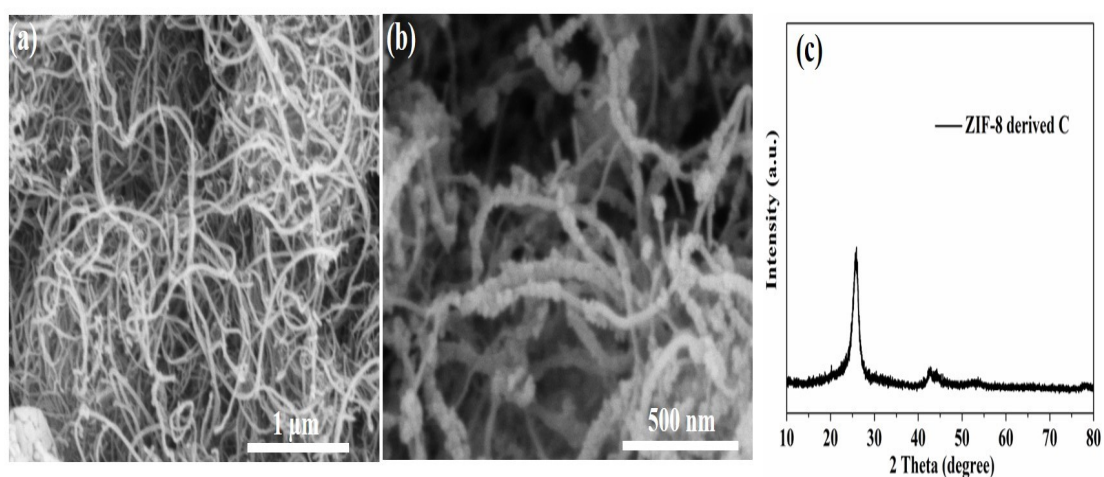

**Fig. S11** The SEM image of (a) pure CNTs, (b) CNTs@ZIF-8 of derived carbon, (c) XRD of the CNTs@ZIF-8 of derived carbon.

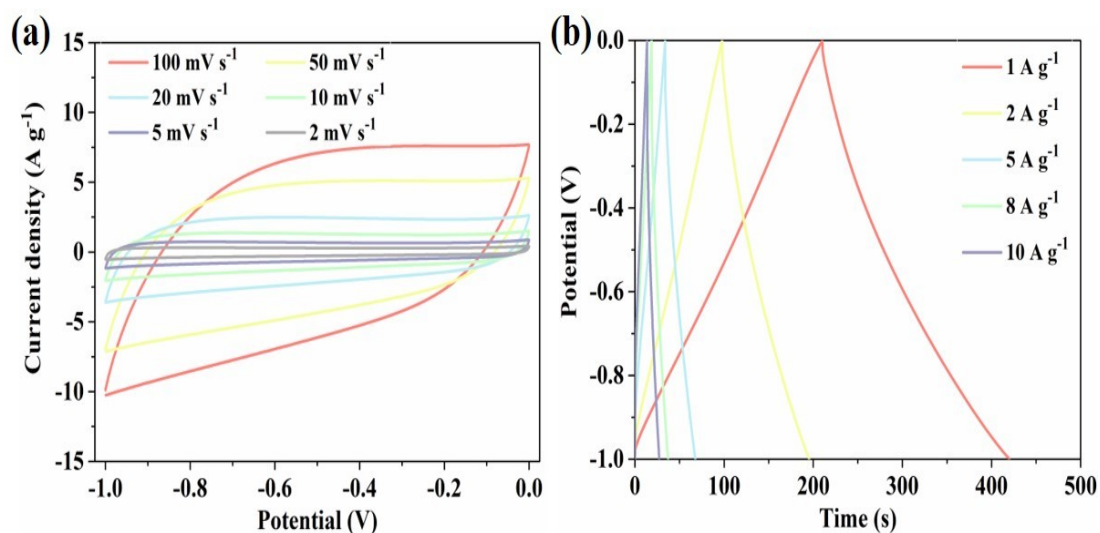

**Fig. S12** (a) CV diagram of the prepared CNT@ZIF-8 derived carbon negative electrode, (b) GCD diagram of negative electrode.

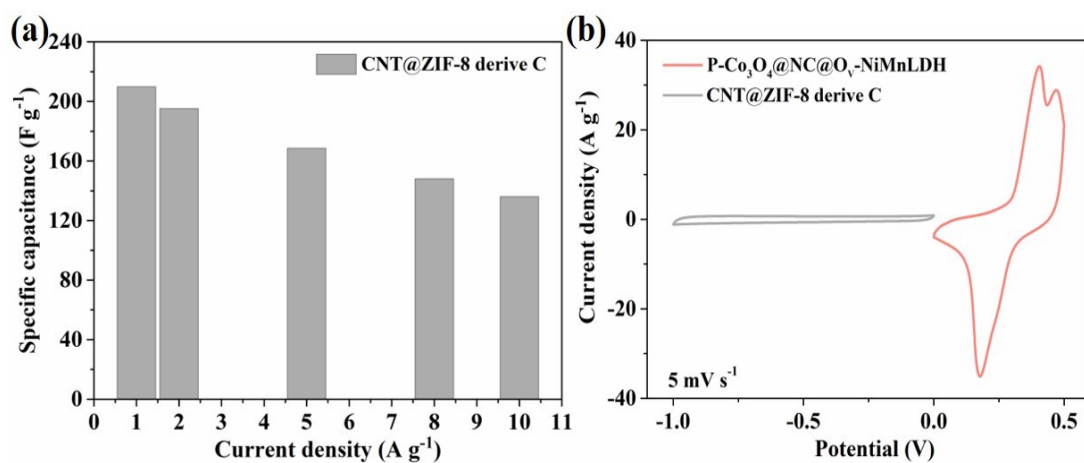

**Fig. S13** (c) Mass specific capacitance diagram of negative electrode, (d) P- $\text{Co}_3\text{O}_4$ @NC@O<sub>v</sub>-NiMnLDH and CNTs@ZIF-8 derived C at scanning rate of  $5 \text{ mV s}^{-1}$ .

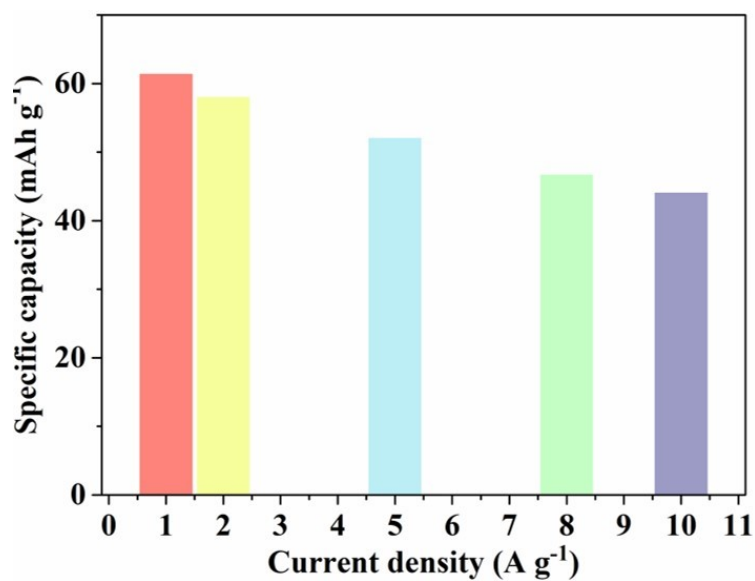

**Fig. S14** The specific capacity of P-Co<sub>3</sub>O<sub>4</sub>@NC@O<sub>v</sub>-NiMnLDH//CNTs@ZIF-8 derived C at different current densities.

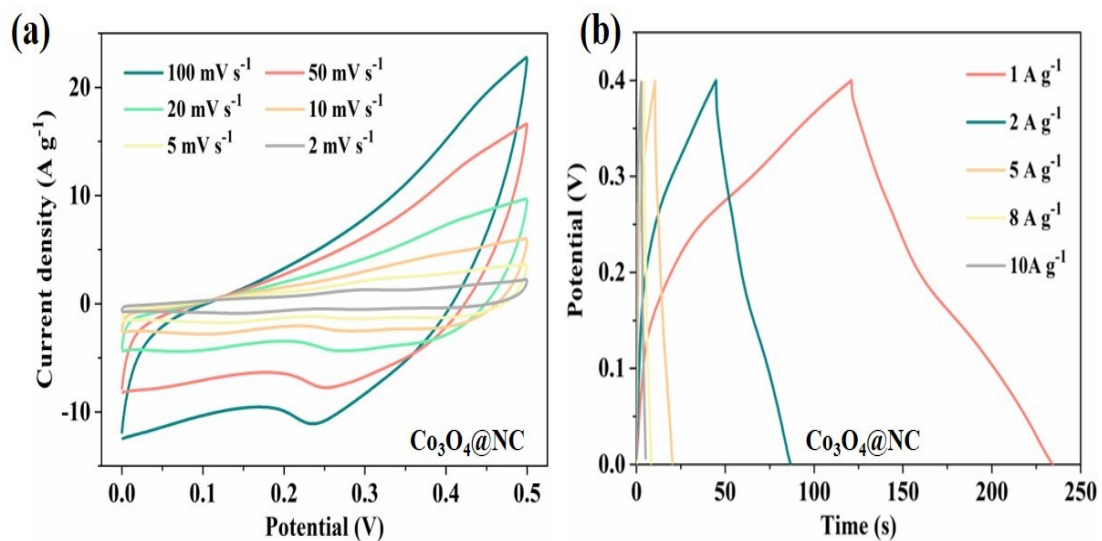

**Fig. S15** (a) CV curves of Co<sub>3</sub>O<sub>4</sub>@NC at different scan rates, (b) GCD curves of Co<sub>3</sub>O<sub>4</sub>@NC at different current density.

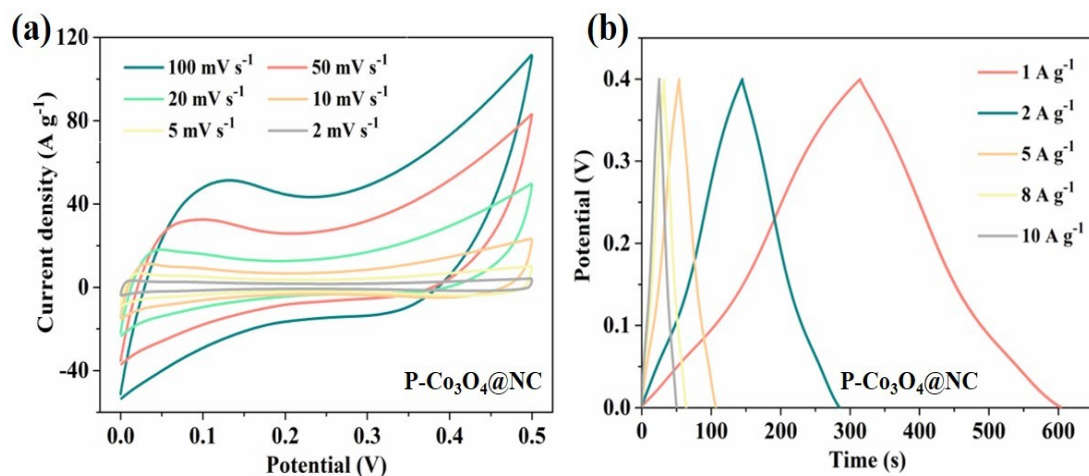

**Fig. S16** (a) CV curves of P-Co<sub>3</sub>O<sub>4</sub>@NC at different scan rates, (b) GCD curves of P-Co<sub>3</sub>O<sub>4</sub>@NC at different current density.

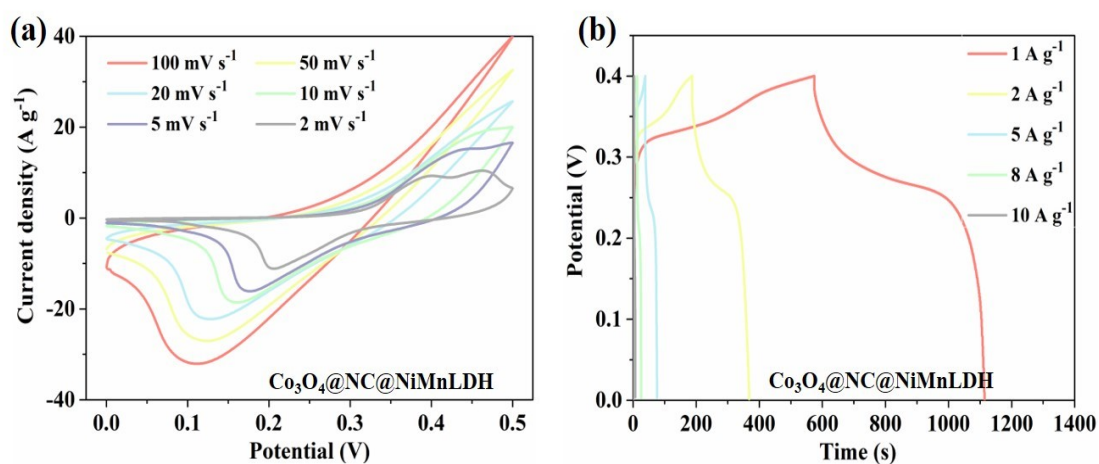

**Fig. S17** (a) CV curves of Co<sub>3</sub>O<sub>4</sub>@NC@NiMnLDH at different scan rates, (b) GCD curves of Co<sub>3</sub>O<sub>4</sub>@NC@NiMnLDH at different current density.

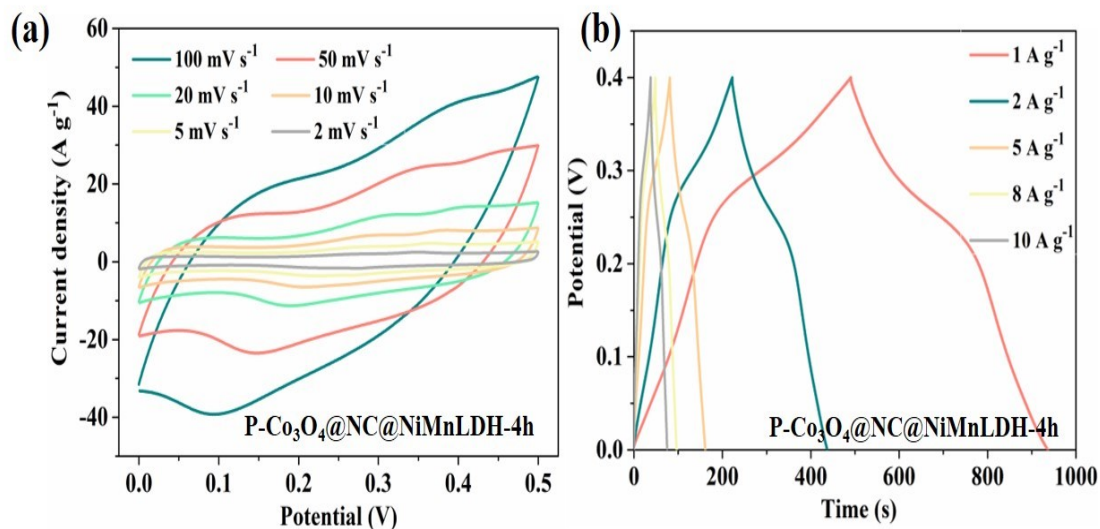

**Fig. S18** (a) CV curves of Co<sub>3</sub>O<sub>4</sub>@NC@NiMnLDH-4h at different scan rates, (b) GCD curves of Co<sub>3</sub>O<sub>4</sub>@NC@NiMnLDH-4h at different current density.

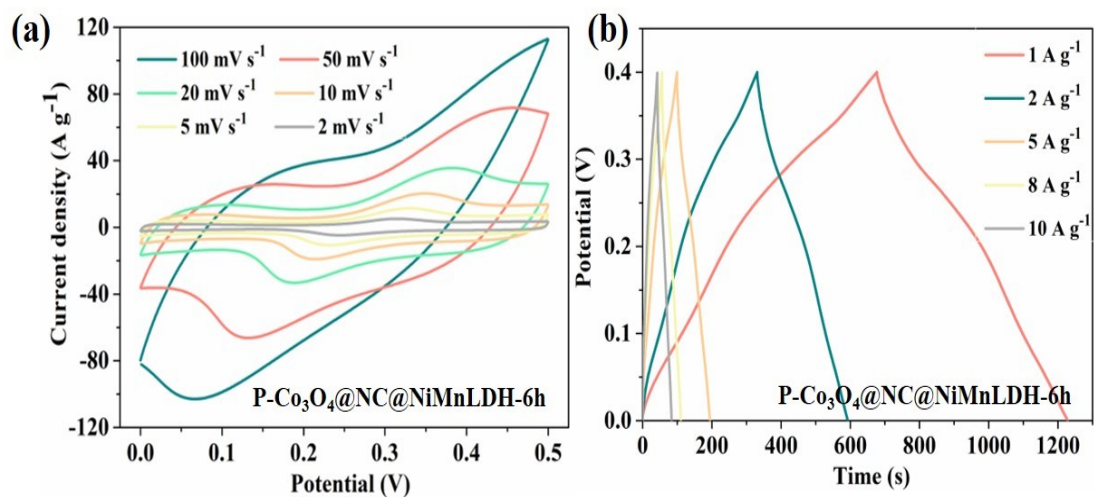

**Fig. S19** (a) CV curves of Co<sub>3</sub>O<sub>4</sub>@NC@NiMnLDH-6h at different scan rates, (b) GCD curves of Co<sub>3</sub>O<sub>4</sub>@NC@NiMnLDH-6h at different current density.

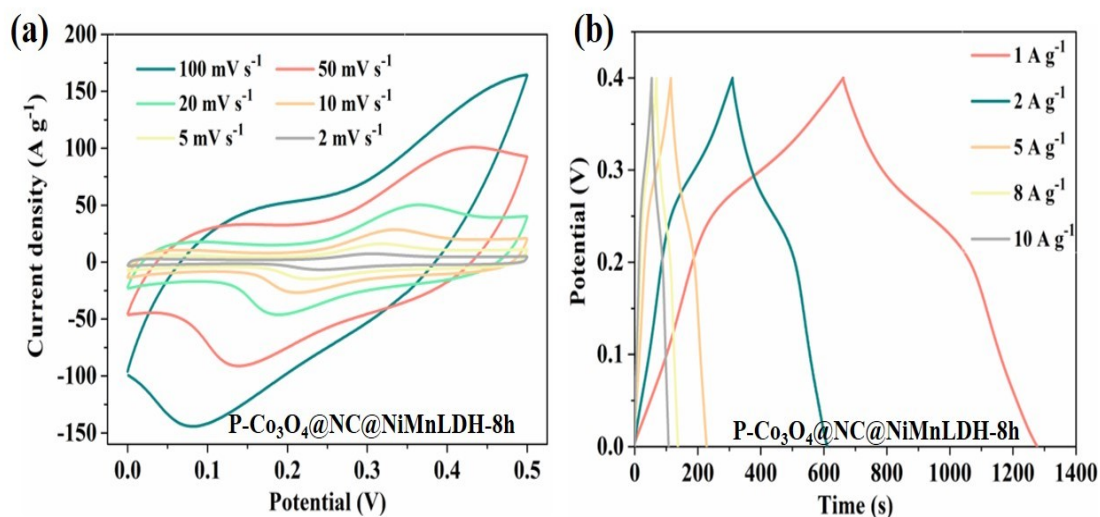

**Fig. S20** (a) CV curves of Co<sub>3</sub>O<sub>4</sub>@NC@NiMnLDH-8h at different scan rates, (b) GCD curves of Co<sub>3</sub>O<sub>4</sub>@NC@NiMnLDH-8h at different current density.

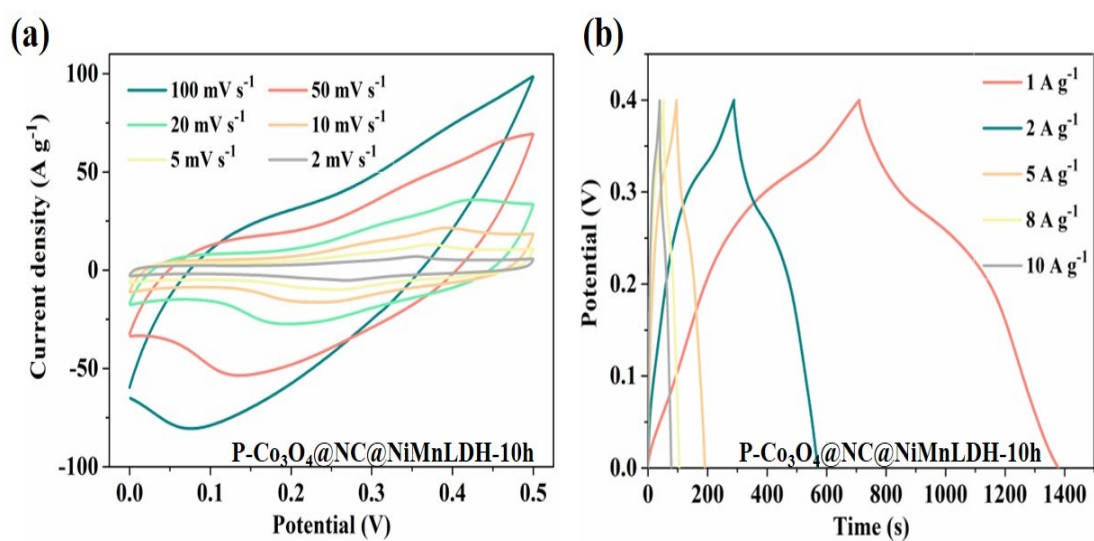

**Fig. S21** (a) CV curves of Co<sub>3</sub>O<sub>4</sub>@NC@NiMnLDH-10h at different scan rates, (b) GCD curves of Co<sub>3</sub>O<sub>4</sub>@NC@NiMnLDH-10h at different current density.

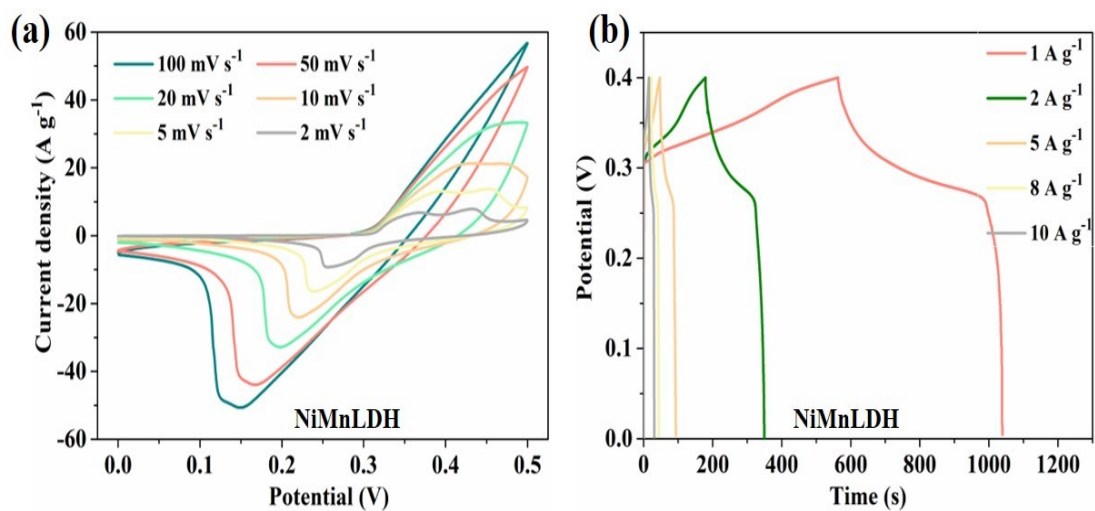

**Fig. S22** (a) CV curves of NiMnLDH (8h) at different scan rates, (b) GCD curves of NiMnLDH at different current density.

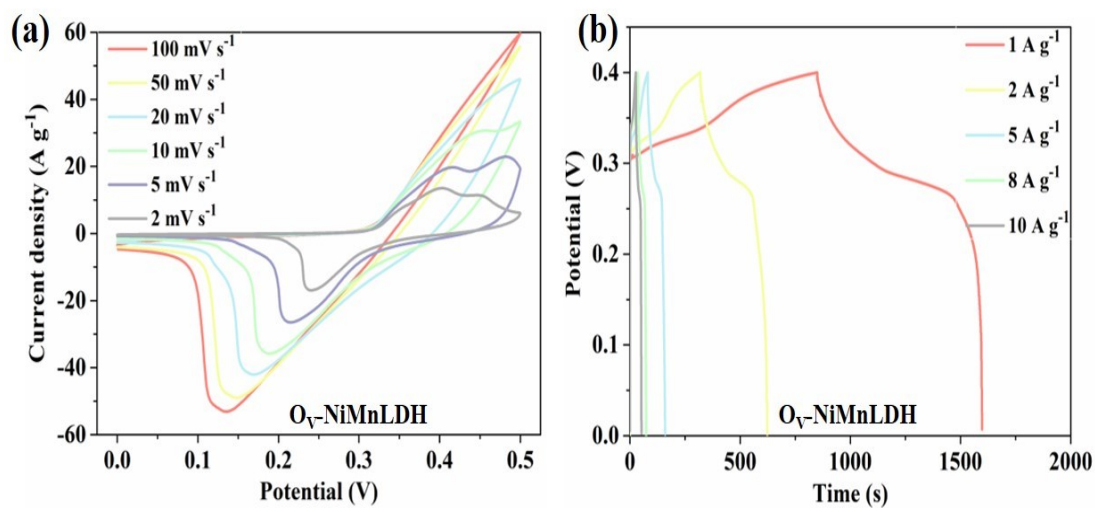

**Fig. S23** (a) CV curves of  $\text{O}_V\text{-NiMnLDH}$  at different scan rates, (b) GCD curves of  $\text{O}_V\text{-NiMnLDH}$  at different current density.

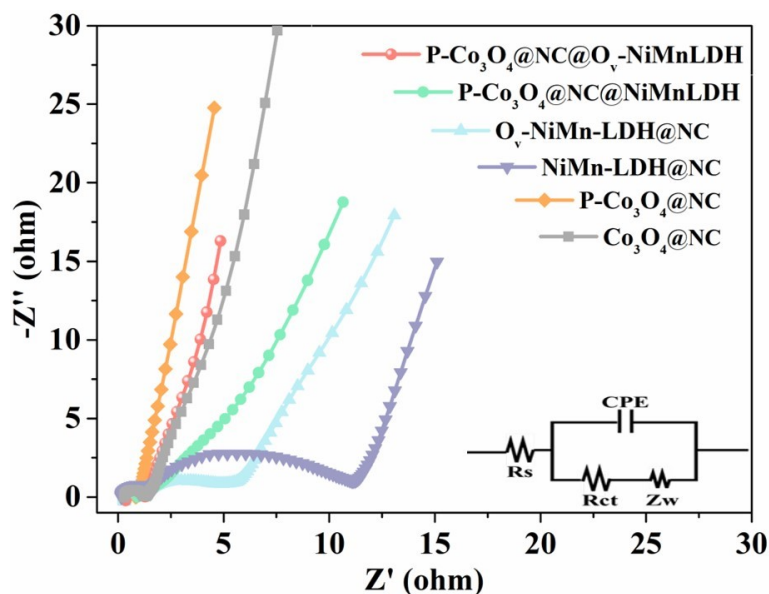

**Fig. S24** EIS curves of as-prepared  $\text{P-Co}_3\text{O}_4@\text{NC}@\text{O}_\text{v}\text{-NiMnLDH}$  electrode and all comparison electrode samples and the built-in diagram is the equivalent circuit diagram.

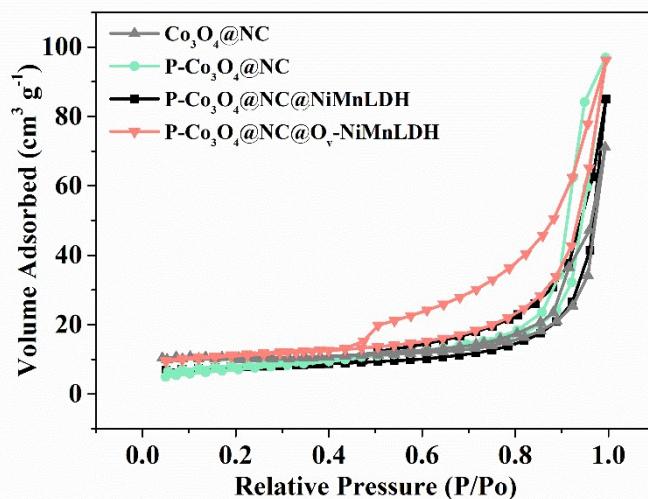

**Fig. S25** The comparison of the BET data of the as-synthesized  $\text{P-Co}_3\text{O}_4@\text{NC}@\text{O}_\text{v}\text{-NiMnLDH}$ , the  $\text{Co}_3\text{O}_4@\text{NC}$ , the  $\text{P-Co}_3\text{O}_4@\text{NC}$  and the  $\text{P-Co}_3\text{O}_4@\text{NC}@\text{NiMnLDH}$  electrode.

The samples used in the BET test were scraped from carbon fibers. The BET surface area of the as-synthesized  $\text{Co}_3\text{O}_4@\text{NC}$ ,  $\text{P-Co}_3\text{O}_4@\text{NC}$ ,  $\text{P-Co}_3\text{O}_4@\text{NC}@\text{NiMnLDH}$  and  $\text{P-Co}_3\text{O}_4@\text{NC}@\text{O}_\text{v}\text{-NiMnLDH}$  sample is  $28.96 \text{ m}^2 \text{ g}^{-1}$ ,  $35.30 \text{ m}^2 \text{ g}^{-1}$ ,  $24.66 \text{ m}^2 \text{ g}^{-1}$  and  $27.81 \text{ m}^2 \text{ g}^{-1}$ , respectively. Compared with the

$\text{Co}_3\text{O}_4@\text{NC}$  electrode, the BET area of  $\text{P-Co}_3\text{O}_4@\text{NC}$  was slightly increased due to P-doping. The subsequent growth of NiMnLDH covered the  $\text{Co}_3\text{O}_4@\text{NC}$  electrode surface, resulting in a slight decrease in the BET area of  $\text{P-Co}_3\text{O}_4@\text{NC}@\text{NiMnLDH}$ . Then, compare with the  $\text{P-Co}_3\text{O}_4@\text{NC}@\text{NiMnLDH}$  electrode, the further introduction of oxygen vacancies makes the BET area of  $\text{P-Co}_3\text{O}_4@\text{NC}@\text{O}_v\text{-NiMnLDH}$  electrode slightly increased. However, on the whole, the BET values are almost close, indicating that the synthesized P-doping site and oxygen vacancy active site play a major role.

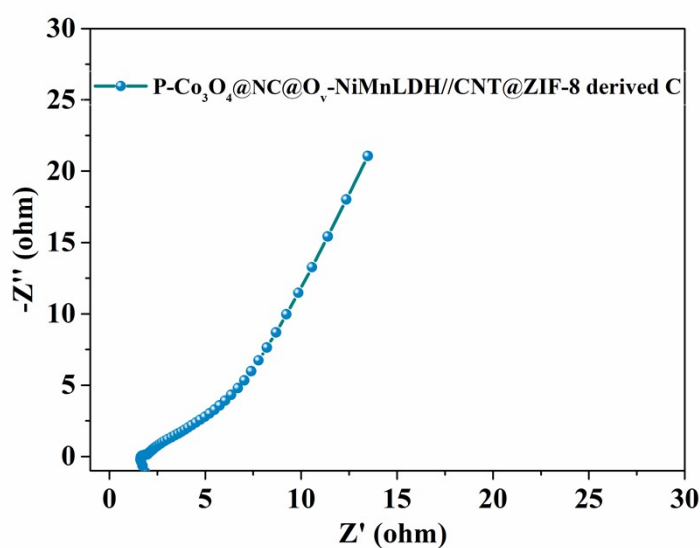

**Fig. S26** The EIS data of the as-prepared  $\text{P-Co}_3\text{O}_4@\text{NC}@\text{O}_v\text{-NiMnLDH//CNT@ZIF-8}$  derived C ASC device.
